# Supplementary material for: Cartilage oligomeric matrix protein is an endogenous β-arrestin-2-selective allosteric modulator of AT1 receptor counteracting vascular injury
Source: PubMed Central journal article supplement (PMC8249609; doi:10.1038/s41422-020-00464-8), 2021-01-28
Supplement: 41422_2020_464_MOESM10_ESM.pdf [file 41422_2020_464_MOESM10_ESM.pdf]

**Table S10. Primer sequences for real-time PCR.**

|                                            | <b>Forward Primer (5'-3')</b> | <b>Reverse Primer (5'-3')</b> |
|--------------------------------------------|-------------------------------|-------------------------------|
| <b>Mouse <math>\beta</math>-actin</b>      | GAGACCTTCAACACCCCAGCC         | TCGGGGCATCGGAACCGCTCA         |
| <b>Mouse AT1a</b>                          | ACCGCTATGGAATACCGCTG          | GAGACACGTGAGCAGGAACA          |
| <b>Mouse IL-6</b>                          | GCTCTGGTCTTCTGGAGTTCC         | GAGTTGGATGGTCTTGGTCCT         |
| <b>Mouse MMP-9</b>                         | GCTGACTACGATAAGGACGGCA        | TAGTGGTGCAGGCAGAGTAGGA        |
| <b>Mouse EGF2</b>                          | GACGTTAATGAGTGCAATGCT         | CGTGCAAACCTGTTTGTGGA          |
| <b>Mouse <math>\beta</math>-arrestin-1</b> | GGCTACAGGAGCGACTCATC          | GGTTCTCAGCACAGAAGGCT          |
| <b>Mouse <math>\beta</math>-arrestin-2</b> | TGGATGGGCAGCTCAAACAT          | CAGCTTCACCTTGACCCTGT          |
| <b>Rat AUF-1</b>                           | CAGACGAGGTGGTCATCAAA          | AGAGGGACCCAACGTCATAC          |
| <b>Rat HuR</b>                             | GTGAGAACGGACCAAAGAGT          | GAAGGGATGCGAGAAATACAAT        |
| <b>Rat COMP</b>                            | GTGACTTCGATGCTGACAAGGT        | GTCTTGATAGCCGAAGATGAAGC       |
| <b>Rat <math>\beta</math>-actin</b>        | GAGACCTTCAACACCCCAGCC         | TCGGGGCATCGGAACCGCTCA         |
